# Supplementary material
Source: MDPI journal article supplement (https://www.mdpi.com/1999-4907/9/4/210)
Supplement: s1 [file s1]

# Exploring the Future of Fuel Loads in Tasmania, Australia: Shifts in Vegetation in Response to Changing Fire Weather, Productivity, and Fire Frequency<sup>†</sup>

Rebecca Mary Bernadette Harris<sup>1,\*</sup>, Tomas Remenyi<sup>1</sup>, Paul Fox-Hughes<sup>2</sup>, Peter Love<sup>1</sup> and Nathaniel L. Bindoff<sup>1,3,4,5</sup>

<sup>1</sup> Antarctic Climate and Ecosystems Cooperative Research Centre (ACE CRC), University of Tasmania, Hobart 7001, Australia, tom.remenyi@utas.edu.au (T.R.); p.t.love@utas.edu.au (P.L.); N.Bindoff@utas.edu.au (N.L.B.)

<sup>2</sup> Bureau of Meteorology, Hobart 7001, Australia; paul.fox-hughes@bom.gov.au

<sup>3</sup> Institute for Marine and Antarctic Studies (IMAS), University of Tasmania, Hobart 7001, Australia

<sup>4</sup> ARC Centre of Excellence for Climate Systems Science, University of Tasmania, Hobart 7001, Australia

<sup>5</sup> Centre for Australian Weather and Climate Research (CAWCR), Commonwealth Scientific and Industrial Research Organisation (CSIRO) Marine and Atmospheric Research, Hobart 7001, Australia

\* Correspondence: rmharris@utas.edu.au; Tel.: +61-3-6226-2920

<sup>†</sup> This paper is an extended version of our paper published in Proceedings of The Modelling and Simulation Society of Australia and New Zealand (MSSANZ) conference 12 2017, pp. 1097–1103. ISBN: 978-0-9872143-7-9. <http://www.mssanz.org.au/modsim2017/H10/harris.pdf>.

## Supplementary Material

Figure S2.1: The distribution of vegetation across Tasmania belonging to the flammability categories in TASVEG 3.0;

Table S2.2. The vegetation pathways followed in the model;

Figure S2.3: Fuel load versus time since fire in the broad vegetation types;

Table S2.3: The vegetation types in the model associated with each fuel accumulation curve;

Table S2.4: Flammability at different levels of Soil Dryness Index (SDI);

Figure S2.5: Impact of fire interval on Potential Future Fire Activity in the Bureau of Meteorology forecast districts.

## S2.1. Flammability of vegetation across Tasmania

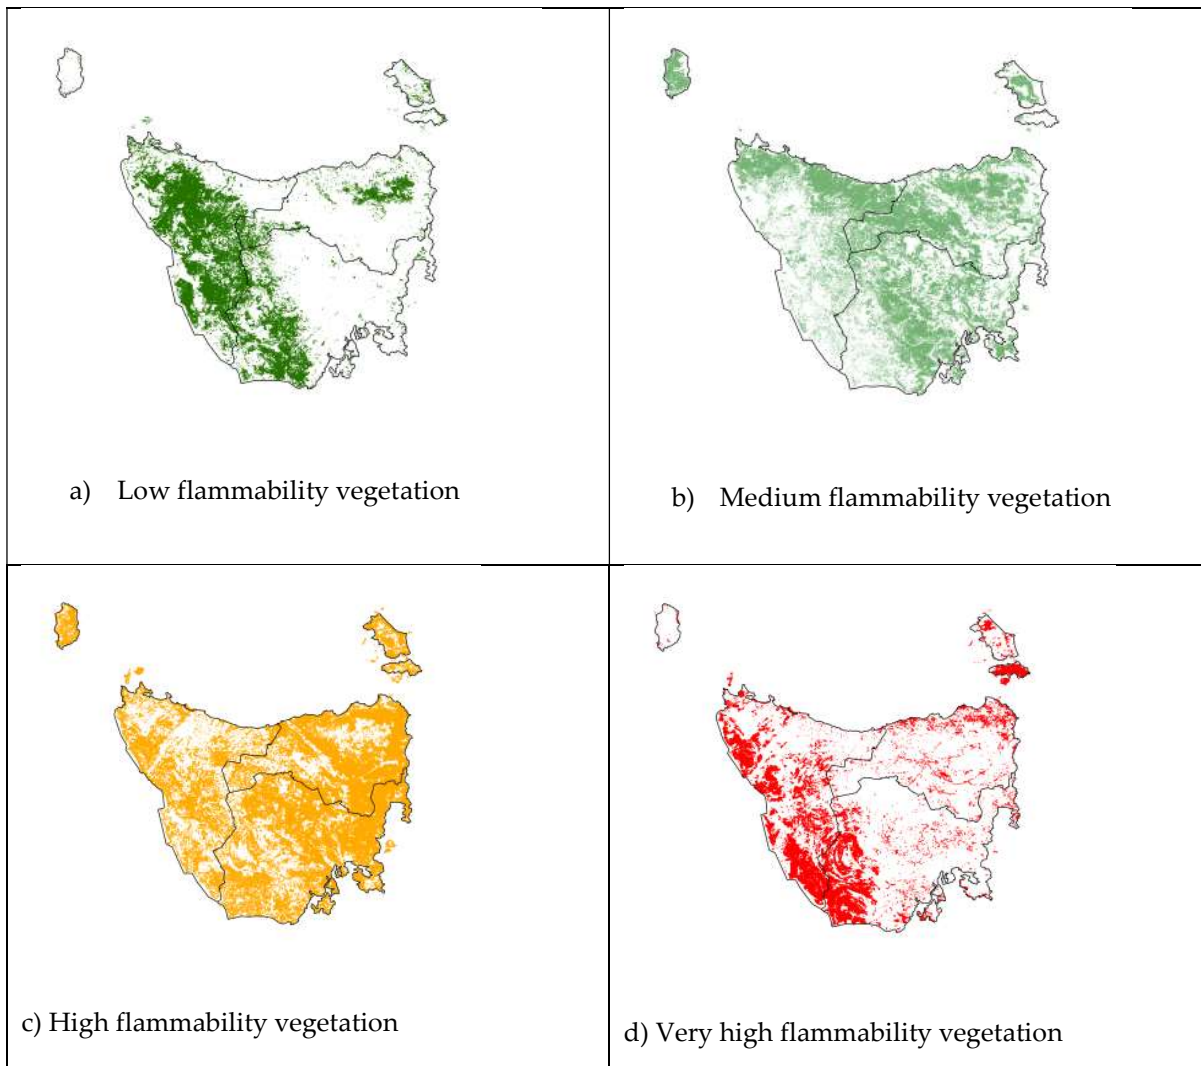

Figure S2.1: The distribution of vegetation across Tasmania belonging to the flammability categories in TASVEG 3.0

## S2.2 The vegetation pathways followed in the model

Table S2.2. The vegetation pathways followed in the model. The order of the vegetation types reflects the pathway followed in the model. The associated TASVEG 3.0 VEGCODEs represent the original vegetation types used to develop the pathway

| Broad Vegetation Type | Pathway                                                                                                                                                                                                                                                                                                                                                                                                                                                                                                                                                                                                                                                                                                                                                                                                                                                       | Tas Veg 3.0 VEGCODE                                                                                                                                                                                                   |
|-----------------------|---------------------------------------------------------------------------------------------------------------------------------------------------------------------------------------------------------------------------------------------------------------------------------------------------------------------------------------------------------------------------------------------------------------------------------------------------------------------------------------------------------------------------------------------------------------------------------------------------------------------------------------------------------------------------------------------------------------------------------------------------------------------------------------------------------------------------------------------------------------|-----------------------------------------------------------------------------------------------------------------------------------------------------------------------------------------------------------------------|
| Buttongrass           | Buttongrass moorland woodland shrubby or heathy understorey;<br>Buttongrass moorland; Buttongrass moorland bare ground                                                                                                                                                                                                                                                                                                                                                                                                                                                                                                                                                                                                                                                                                                                                        | MBE; MBP; MBR; MBS;<br>MBU; MBW; MRR;<br>MSW                                                                                                                                                                          |
| Generic               | Generic forest; Generic dry scrub; Generic woodland shrubby or heathy understorey; Generic woodland grassy understorey; Generic grassland; Generic bare ground; Generic heathland; Generic heathland grassland; Generic heathland bare ground;                                                                                                                                                                                                                                                                                                                                                                                                                                                                                                                                                                                                                | NBA; SAL; SCA; SED;<br>SLS; SMP; SSC; SKA;<br>GCL; GHC; GPH; GPL;<br>GRP; GTL; SCH; SHW;<br>SLG; SRH; SSZ; SCL;<br>DBA; DGW; DMW;<br>DVG; DOW; DKW;<br>DPD; DPO                                                       |
| Eucalypt              | Eucalypt wet sclerophyll forest with rainforest understorey;<br>Eucalypt wet sclerophyll forest broadleaf tree understorey; Eucalypt wet sclerophyll forest with shrubby or heathy understorey; Eucalypt dry sclerophyll forest shrubby understorey; Eucalypt dry sclerophyll forest shrubby or heathy or broadleaf understorey; Eucalypt dry sclerophyll forest shrubby or heathy or buttongrass understorey; Eucalypt dry sclerophyll forest shrubby or heathy or grassy understorey; Eucalypt dry sclerophyll forest shrubby or heathy understorey; Eucalypt dry sclerophyll forest shrubby or grassy understorey; Eucalypt dry sclerophyll forest heathy understorey; Eucalypt dry sclerophyll forest grassy understorey; Eucalypt woodland shrubby or heathy understorey; Eucalypt woodland grassy understorey; Eucalypt grassland; Eucalypt bare ground | DGL; DTO; DAC; DNI;<br>DAM; DSG; DSO; DTD;<br>DTG; DDE; DOV; DPU;<br>DRI; DRO; DAS; DOB;<br>DVC; DSC; DNF; DAD;<br>WDB; WOB; WVI;<br>WDA; WDL; WNL;<br>WOL; WRE; WSU;<br>WDU; WOU; WNU;<br>WBR; WDR; WGK;<br>WNR; WOR |
| Non-Eucalypt          | Non-eucalypt wet forest broadleaf understorey; Non-eucalypt wet forest shrubby or broadleaf understorey; Non-eucalypt wet forest shrubby understorey; Non-eucalypt wet forest heathy understorey; Non-eucalypt wet forest sedgely understorey; Non-eucalypt wet scrub shrubby understorey; Non-eucalypt wet scrub heathy understorey; Non-eucalypt wet scrub sedgely understorey; Non-eucalypt dry forest; Non-eucalypt dry scrub; Non-eucalypt heathland; Non-eucalypt grassland; Non-eucalypt bare ground                                                                                                                                                                                                                                                                                                                                                   | NRL; NRV; NCR; NRR;<br>NRD; NLM; NRF; NME;<br>NBS; NLA; SBM; NLE;<br>SSK; SWR; SBR; SRE;<br>SLL; SLW; SMM; SMR;<br>SWW                                                                                                |
| Sphagnum              | Sphagnum; Sphagnum sedgeland; Sphagnum bare ground                                                                                                                                                                                                                                                                                                                                                                                                                                                                                                                                                                                                                                                                                                                                                                                                            | GSL; MSP                                                                                                                                                                                                              |
| Rainforest            | Rainforest with conifers or deciduous beech; Rainforest without conifers or deciduous beech; Rainforest wet scrub shrubby understorey; Rainforest wet scrub heathy understorey; Rainforest wet scrub sedgely understorey; Rainforest heathland; Rainforest sedgeland; Rainforest grassland; Rainforest bare ground                                                                                                                                                                                                                                                                                                                                                                                                                                                                                                                                            | RHP; RKF; RKP; RKX;<br>RMU; RMT; RCO; RFE;<br>RML; RMS; RSH; SRF                                                                                                                                                      |

|           |                                                                                                                                                       |                                                        |
|-----------|-------------------------------------------------------------------------------------------------------------------------------------------------------|--------------------------------------------------------|
| Subalpine | Subalpine rainforest; Subalpine scrub; Subalpine woodland;<br>Subalpine heathland; Subalpine sedgeland; Subalpine grassland;<br>Subalpine bare ground | DCO; RKS; SHS; RPF;<br>RPP; SSW; DDP; NLN;<br>RPW      |
| Alpine    | Alpine heathland with conifers; Alpine heathland without conifers;<br>Alpine rushland or sedgeland; Alpine bare ground                                | HUE; HCH; RFS; HCM;<br>HHE; HHW; HSE; HSW;<br>MDS; MGH |

### S2.3. Accumulation curves

The fuel load was calculated for each broad vegetation type at each time step, using Olson's model of fuel accumulation [28]:

$$\text{Biomass (of fuel)} = L \cdot (1 - \exp(-k \cdot A))$$

Where L represents the carrying capacity (or maximum fuel load), k is the growth rate (or decomposition rate), and A is age (or time since fire)

Values for carrying capacity and growth rate in Tasmanian vegetation types were decided on after consultation with the literature and fire ecologists (Jon Marsden-Smedley, Dave Taylor, pers. comm.), and resulted in the accumulation curves shown in Figure S3.1. The value for the TASVEG type that made up the greatest area of each Broad Vegetation Type was used.

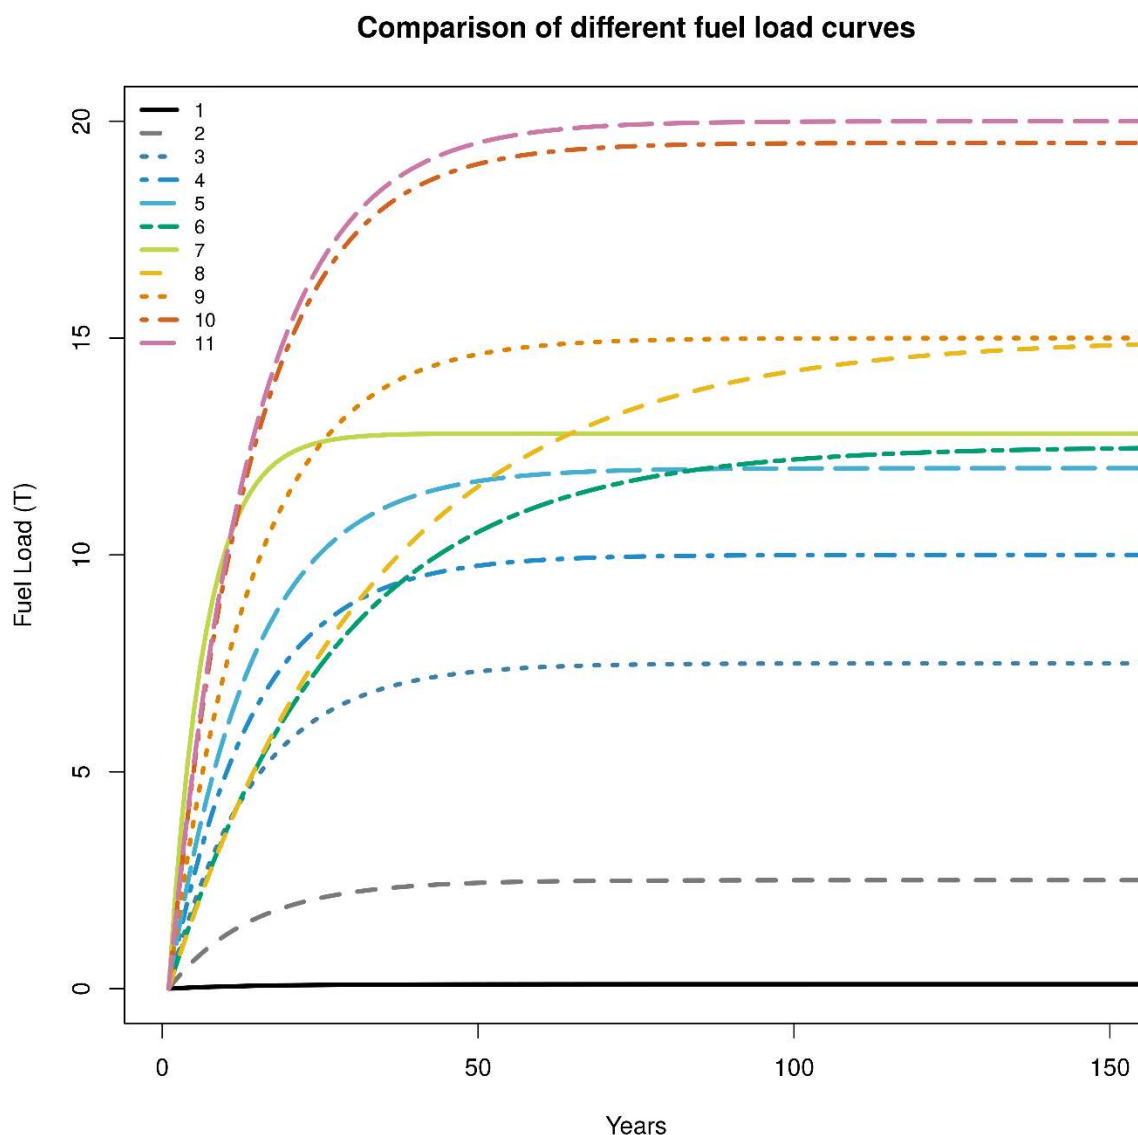

Figure S2.3: Fuel load versus time since fire in the broad vegetation types. The vegetation types associated with each curve are shown in Table S2.3.

Table S2.3: The vegetation types in the model associated with each fuel accumulation curve. Note that each type represents the different transition pathways that the current vegetation can follow, rather than an existing vegetation type.

1. "Bare ground"
2. Subalpine woodland
3. Eucalypt dry sclerophyll forest shrubby/ heathy/ grassy understorey
4. Alpine heathland with conifers
5. Alpine rushland/sedgeland; Buttongrass moorland woodland shrubby or heathy understorey, Buttongrass moorland, Eucalypt woodland shrubby or heathy understorey, Eucalypt woodland grassy understorey, Eucalypt grassland, Generic heathland grassland, Generic woodland shrubby or heathy understorey, Generic woodland grassy understorey, Generic grassland, Non-eucalypt grassland, Rainforest sedgeland, Rainforest grassland, Sphagnum sedgeland, Subalpine sedgeland, Subalpine grassland
6. Rainforest with conifers or deciduous beech; Rainforest without conifers or deciduous beech
7. Eucalypt dry sclerophyll forest shrubby or heathy understorey
8. Non-eucalypt wet scrub shrubby/heathy/sedgey understorey; Non-eucalypt wet scrub understorey, Rainforest wet scrub shrubby/ heathy/ sedgey understorey
9. Alpine heathland without conifers; Eucalypt dry sclerophyll forest shrubby/heathy/broadleaf/ grassy understorey; Generic forest; Non-eucalypt dry forest; Non-eucalypt dry scrub; Subalpine scrub; Subalpine heathland
10. Eucalypt wet sclerophyll forest with rainforest/ broadleaf/ shrubby/ heathy understorey; Non-eucalypt wet forest broadleaf/ shrubby/ heathy/ sedgey understorey; Subalpine rainforest
11. Generic heathland, Generic dry scrub, Non-eucalypt heathland, Rainforest heathland

## S2.4. Flammability of vegetation types at different Soil Dryness Index levels

Table S2.4: Flammability at different levels of Soil Dryness Index (SDI), from Marsden-Smedley (2009).

| <b>Soil Dryness Index</b> | <b>Broad Vegetation Type</b>                         | <b>Flammability</b> |
|---------------------------|------------------------------------------------------|---------------------|
| ≤10                       | Buttongrass moorland                                 | High                |
|                           | Wet scrub, dry eucalypt forest                       | Very low            |
|                           | All other types                                      | Non-flammable       |
| 11-15                     | Buttongrass moorland                                 | Very high           |
|                           | Wet scrub, dry eucalypt forest                       | Low                 |
|                           | Wet eucalypt forest                                  | Very low            |
|                           | Rainforest                                           | Non-flammable       |
| 16-25                     | Buttongrass moorland                                 | Very high           |
|                           | Wet scrub                                            | High                |
|                           | Dry eucalypt forest, Wet eucalypt forest             | Moderate            |
|                           | Rainforest                                           | Non-flammable       |
| 26-50                     | Buttongrass moorland                                 | Very high           |
|                           | Wet scrub, Dry eucalypt forest                       | High                |
|                           | Wet eucalypt forest                                  | Moderate            |
|                           | Rainforest                                           | Low                 |
|                           | Buttongrass moorland, Wet scrub, Dry eucalypt forest | Very high           |
| >50                       | Wet eucalypt forest                                  | High                |
|                           | Rainforest                                           | Moderate            |

## S2.5. Impact of fire frequency on Potential Future Fire Activity (PFFA)

Changes to the Potential Fire Activity (PFFA) over the coming decades can be generated for any region, and will reflect the different vegetation types within the region of interest. We illustrate it here using the Tasmanian forecast districts of the Bureau of Meteorology.

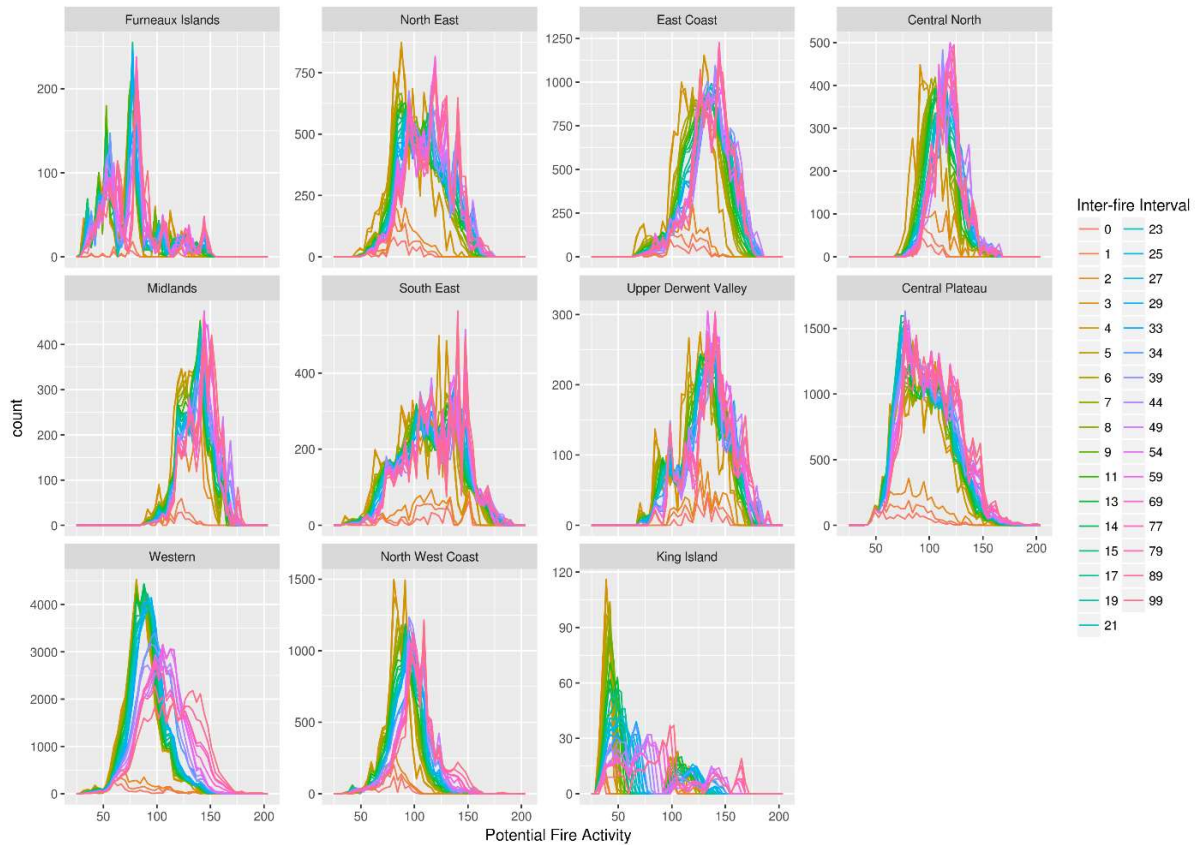

Figure S2.5: Impact of fire interval on Potential Future Fire Activity in the Bureau of Meteorology forecast districts.
